# Supplementary material for: Genomewide characterisation of the genetic diversity of carotenogenesis in bacteria of the order Sphingomonadales
Source: PubMed Central journal article supplement (PMC5989583; doi:10.1099/mgen.0.000172), 2018-04-05
Supplement: mgen-4-172-s001.pdf [file mgen-4-172-s001.pdf]

**Table S1.** Locus tags of putative proteins that may have a direct/indirect role in carotenoid biosynthesis in *Sphingomonadales*

|    | <b>CrtE</b>            | <b>CrtB</b>            | <b>LOG</b>             | <b>CrtI</b>            | <b>CrtY</b>            | <b>CrtG</b>            | <b>DUF2141*</b>        | <b>CrtZ</b>            | <b>CrtW</b>           |
|----|------------------------|------------------------|------------------------|------------------------|------------------------|------------------------|------------------------|------------------------|-----------------------|
| 1  | Sala_2194<br>306 aa    | Sala_3132<br>327 aa    | Sala_3133<br>193 aa    | Sala_3134<br>492 aa    | Sala_3135<br>385 aa    | Sala_3136<br>253 aa    | Sala_3137<br>119 aa    | Sala_2128<br>172 aa    | None                  |
| 2  | AN936_01555<br>305 aa  | AN936_02675<br>316 aa  | AN936_02670<br>193 aa  | AN936_02665<br>491 aa  | AN936_02660<br>385 aa  | AN936_02655<br>256 aa  | AN936_02650<br>119 aa  | AN936_16185<br>172 aa  | None                  |
| 3  | SKP52_03550<br>306 aa  | SKP52_02265<br>319 aa  | SKP52_02260<br>193 aa  | SKP52_02255<br>490 aa  | SKP52_02250<br>385 aa  | SKP52_02245<br>255 aa  | SKP52_02240<br>119 aa  | SKP52_17370<br>172 aa  | None                  |
| 4  | NX02_22505<br>293 aa   | NX02_00980<br>312 aa   | NX02_00975<br>192 aa   | NX02_00970<br>494 aa   | NX02_00965<br>393 aa   | NX02_00960<br>265 aa   | NX02_00955<br>119 aa   | NX02_21750<br>172 aa   | None                  |
| 5  | AZE99_02430<br>300 aa  | AZE99_09605<br>311 aa  | AZE99_15750<br>189 aa  | AZE99_09600<br>503 aa  | AZE99_09595<br>388 aa  | AZE99_09590<br>254 aa  | AZE99_09585<br>120 aa  | AZE99_11975<br>171 aa  | None                  |
| 6  | LH20_15970<br>307 aa   | LH20_01385<br>319 aa   | LH20_01380<br>193 aa   | LH20_01375<br>491 aa   | LH20_01370<br>386 aa   | LH20_01360<br>252 aa   | LH20_01355<br>119 aa   | LH20_13675<br>172 aa   | None                  |
| 7  | AOA14_02810<br>299 aa  | AOA14_09220<br>323 aa  | AOA14_09215<br>193 aa  | AOA14_09210<br>490 aa  | AOA14_09205<br>385 aa  | AOA14_09195<br>262 aa  | AOA14_09190<br>119 aa  | AOA14_05275<br>172 aa  | None                  |
| 8  | SLG_30760<br>300 aa    | SLG_31750<br>321 aa    | SLG_31740<br>196 aa    | SLG_31730<br>492 aa    | SLG_31720<br>387 aa    | SLG_31700<br>249 aa    | SLG_31690<br>120 aa    | SLG_38860<br>174 aa    | None                  |
| 9  | TS85_16025<br>299 aa   | TS85_20435<br>311 aa   | TS85_20440<br>193 aa   | TS85_20445<br>491 aa   | TS85_20450<br>393 aa   | TS85_20465<br>262 aa   | TS85_20470<br>119 aa   | TS85_19965<br>166 aa   | None                  |
| 10 | ASE13_12915<br>302 aa  | ASE13_12025<br>318 aa  | ASE13_12030<br>193 aa  | ASE13_12035<br>492 aa  | ASE13_12040<br>386 aa  | ASE13_12060<br>249 aa  | None                   | ASE13_11100<br>166 aa  | None                  |
| 11 | Sphi55_0001<br>302 aa  | Sphi55_0002<br>307 aa  | Sphi55_0003<br>193 aa  | Sphi55_0004<br>492 aa  | Sphi55_0005<br>385 aa  | Sphi55_0007<br>265 aa  | Sphi55_0008<br>119 aa  | Sphi55_0006<br>166 aa  | Sphi55_0009<br>261 aa |
| 12 | SP6_03_00020<br>299 aa | SP6_42_00220<br>316 aa | SP6_42_00230<br>193 aa | SP6_42_00180<br>491 aa | SP6_42_00170<br>390 aa | SP6_42_00290<br>271 aa | SP6_42_00300<br>119 aa | SP6_29_00510<br>179 aa | None                  |
| 13 | Sasta_0001<br>301 aa   | Sasta_0002<br>312 aa   | Sasta_0003<br>193 aa   | Sasta_0004<br>487 aa   | Sasta_0005<br>380 aa   | None                   | Sasta_0008<br>120 aa   | Sasta_0006<br>176 aa   | Sasta_0009<br>258 aa  |
| 14 | Sphch_1308<br>302 aa   | Sphch_1941<br>317 aa   | Sphch_1942<br>193 aa   | Sphch_1943<br>493 aa   | Sphch_1944<br>383 aa   | Sphch_2837<br>241 aa   | Sphch_2838<br>119 aa   | Sphch_2465<br>167 aa   | None                  |
| 15 | K663_05560<br>302 aa   | K663_01410<br>319 aa   | K663_01405<br>193 aa   | K663_01400<br>493 aa   | K663_01395<br>383 aa   | K663_13655<br>242 aa   | K663_13650<br>119 aa   | K663_01820<br>170 aa   | None                  |

|    |                             |                             |                             |                             |                             |                             |                             |                             |                       |
|----|-----------------------------|-----------------------------|-----------------------------|-----------------------------|-----------------------------|-----------------------------|-----------------------------|-----------------------------|-----------------------|
| 16 | EP837_00635<br>302 aa       | EP837_01648<br>319 aa       | EP837_01647<br>193 aa       | EP837_01646<br>493 aa       | EP837_01645<br>383 aa       | EP837_01002<br>242 aa       | EP837_01001<br>119 aa       | EP837_01682<br>170 aa       | None                  |
| 17 | TZ53_03080<br>306 aa        | TZ53_10675<br>317 aa        | TZ53_10670<br>193 aa        | TZ53_10665<br>493 aa        | TZ53_10660<br>386 aa        | TZ53_01450<br>237 aa        | TZ53_01445<br>119 aa        | TZ53_12060<br>169 aa        | None                  |
| 18 | Saro_2253<br>303 aa         | Saro_1814<br>323 aa         | Saro_1815<br>193 aa         | Saro_1816<br>492 aa         | Saro_1817<br>398 aa         | Saro_0236<br>236 aa         | Saro_0235<br>121 aa         | Saro_1168<br>172 aa         | None                  |
| 19 | WG74_10145<br>302 aa        | WG74_04285<br>324 aa        | WG74_04290<br>195 aa        | WG74_04295<br>500 aa        | WG74_04300<br>403 aa        | WG74_03350<br>240 aa        | WG74_03345<br>122 aa        | WG74_11370<br>172 aa        | None                  |
| 20 | A6F68_02109<br>304 aa       | A6F68_02787<br>341 aa       | A6F68_02786<br>193 aa       | A6F68_02785<br>497 aa       | A6F68_02784<br>393 aa       | A6F68_00557<br>237 aa       | A6F68_00556<br>121 aa       | A6F68_01016<br>172 aa       | None                  |
| 21 | A6F65_01603<br>303 aa       | A6F65_00929<br>344 aa       | A6F65_00930<br>201 aa       | A6F65_00931<br>508 aa       | A6F65_00932<br>402 aa       | A6F65_00501<br>239 aa       | A6F65_00500<br>122 aa       | A6F65_02209<br>166 aa       | A6F65_02210<br>262 aa |
| 22 | AMC99_01057<br>301 aa       | AMC99_00377<br>341 aa       | AMC99_00378<br>193 aa       | AMC99_00379<br>523 aa       | AMC99_00380<br>394 aa       | AMC99_02463<br>244 aa       | AMC99_02464<br>121 aa       | AMC99_01700<br>173 aa       | None                  |
| 23 | WYH_00402<br>301 aa         | WYH_03017<br>341 aa         | WYH_03018<br>193 aa         | WYH_03019<br>501 aa         | WYH_03020<br>393 aa         | WYH_02232<br>238 aa         | WYH_02233<br>121 aa         | WYH_00011<br>172 aa         | None                  |
| 24 | Altish_0001<br>301 aa       | Altish_0002<br>315 aa       | Altish_0003<br>193 aa       | Altish_0004<br>520 aa       | Altish_0005<br>402 aa       | Altish_0007<br>240 aa       | Altish_0008<br>121 aa       | Altish_0006<br>166 aa       | Altish_0009<br>255 aa |
| 25 | ELI_05575<br>302 aa         | ELI_09895<br>341 aa         | ELI_09890<br>193 aa         | ELI_09885<br>501 aa         | ELI_09880<br>400 aa         | ELI_12610<br>240 aa         | ELI_12615<br>121 aa         | ELI_03325<br>166 aa         | ELI_03320<br>255 aa   |
| 26 | CP97_10495<br>301 aa        | CP97_13035<br>348 aa        | CP97_13030<br>193 aa        | CP97_13025<br>498 aa        | CP97_13020<br>398 aa        | CP97_01785<br>241 aa        | CP97_01790<br>121 aa        | CP97_11790<br>172 aa        | None                  |
| 27 | HMPREF9718_<br>03593 301 aa | HMPREF9718_<br>02587 329 aa | HMPREF9718_<br>02588 193 aa | HMPREF9718_<br>02589 493 aa | HMPREF9718_<br>02590 382 aa | HMPREF9718_<br>03515 246 aa | HMPREF9718_<br>03516 119 aa | HMPREF9718_<br>02777 172 aa | None                  |
| 28 | PP1Y_AT24739<br>301 aa      | PP1Y_AT8258<br>317 aa       | PP1Y_AT8268<br>193 aa       | PP1Y_AT8278<br>492 aa       | PP1Y_AT8289<br>408 aa       | PP1Y_AT36759<br>240 aa      | PP1Y_AT36765<br>120 aa      | PP1Y_AT11105<br>172 aa      | None                  |
| 29 | JI59_00550<br>301 aa        | JI59_14775<br>317 aa        | JI59_14780<br>193 aa        | JI59_14790<br>492 aa        | JI59_14795<br>408 aa        | JI59_11990<br>240 aa        | JI59_11985<br>120 aa        | JI59_06385<br>172 aa        | None                  |
| 30 | A9D12_11730<br>303 aa       | A9D12_07620<br>321 aa       | A9D12_07625<br>193 aa       | A9D12_07635<br>520 aa       | A9D12_07640<br>425 aa       | A9D12_05235<br>257 aa       | A9D12_05230<br>121 aa       | A9D12_01070<br>179 aa       | A9D12_01075<br>267 aa |
| 31 | A7E77_04905<br>300 aa       | A7E77_09430<br>314 aa       | A7E77_09425<br>193 aa       | A7E77_09415<br>491 aa       | A7E77_09410<br>388 aa       | A7E77_06785<br>270 aa       | A7E77_06790<br>119 aa       | A7E77_07315<br>171 aa       | None                  |
| 32 | BJP26_00185<br>300 aa       | BJP26_05345<br>314 aa       | BJP26_05340<br>193 aa       | BJP26_05325<br>491 aa       | BJP26_05320<br>388 aa       | BJP26_02355<br>270 aa       | BJP26_02360<br>119 aa       | BJP26_02830<br>171 aa       | None                  |

|    |                        |                        |                        |                        |                        |                        |                        |                        |                      |
|----|------------------------|------------------------|------------------------|------------------------|------------------------|------------------------|------------------------|------------------------|----------------------|
| 33 | AM2010_812<br>302 aa   | AM2010_155<br>346 aa   | AM2010_156<br>193 aa   | AM2010_158<br>520 aa   | AM2010_159<br>393 aa   | AM2010_2362<br>240 aa  | AM2010_1236<br>120 aa  | AM2010_1583<br>172 aa  | None                 |
| 34 | AB433_06870<br>312 aa  | AB433_09240<br>328 aa  | AB433_12870<br>189 aa  | AB433_09235<br>496 aa  | AB433_09230<br>398 aa  | AB433_15915<br>250 aa  | AB433_15920<br>119 aa  | AB433_00865<br>174 aa  | None                 |
| 35 | MC45_16265<br>296 aa   | MC45_14215<br>316 aa   | MC45_14210<br>193 aa   | MC45_14760<br>491 aa   | MC45_14765<br>388 aa   | MC45_14775<br>274 aa   | MC45_14780<br>119 aa   | MC45_05470<br>155 aa   | MC45_05465<br>238 aa |
| 36 | BW41_00905<br>296 aa   | BW41_00781<br>315 aa   | BW41_00782<br>193 aa   | BW41_03520<br>491 aa   | BW41_03521<br>388 aa   | BW41_03523<br>272 aa   | BW41_03524<br>119 aa   | BW41_00240<br>155 aa   | BW41_00241<br>236 aa |
| 37 | SJA_C1-33430<br>305 aa | SJA_C1-01890<br>317 aa | SJA_C1-01590<br>193 aa | SJA_C1-01600<br>493 aa | SJA_C1-01610<br>386 aa | SJA_C1-28960<br>241 aa | SJA_C1-28950<br>119 aa | SJA_C1-06860<br>169 aa | None                 |
| 38 | G432_12610<br>305 aa   | None                   | G432_07845<br>193 aa   | G432_07840<br>492 aa   | G432_07835<br>394 aa   | None                   | None                   | None                   | None                 |
| 39 | ATN00_08710<br>303 aa  | None                   | ATN00_06065<br>193 aa  | ATN00_06060<br>493 aa  | None                   | None                   | None                   | None                   | None                 |
| 40 | Swit_0022<br>297 aa    | None                   | Swit_3199<br>196 aa    | None                   | Swit_3200<br>380 aa    | None                   | None                   | None                   | None                 |
| 41 | SGRAN_0972<br>307 aa   | None                   | SGRAN_3508<br>193 aa   | None                   | None                   | None                   | None                   | None                   | None                 |

Serial numbers in the first column are the same as in Tables 1 and S2.

\*Number of aa is counted from the first conserved substitution (V/L/I).

Sequences for locus tags in serial numbers 11, 13, and 24 are provided after Fig. S1.

**Table S2.** Comparison of the features of *crt* and *log* ORFs identified in strains of *Sphingomonadales*

|   | <b>Species<br/>(strain)</b>                                | <b><i>crtY</i><br/>Length<br/>(Start.<br/>.Stop)</b> | <b><i>crtI</i><br/>Length<br/>(Start.<br/>.Stop)</b> | <b>Gap/overlap<br/>between <i>crtY</i><br/>and <i>crtI</i></b> | <b>Gap/overlap<br/>between<br/><i>crtI</i> and <i>log</i></b> | <b><i>log</i><br/>Length<br/>(Start.<br/>.Stop)</b> | <b><i>crtB</i><br/>Length<br/>(Start.<br/>.Stop)</b> | <b>Gap/overlap<br/>between <i>log</i><br/>and <i>crtB</i></b> | <b><i>crtG</i><br/>Length<br/>(Start.<br/>.Stop)</b> | <b><i>crtZ</i><br/>Length<br/>(Start.<br/>.Stop)</b> | <b><i>crtW</i><br/>Length<br/>(Start.<br/>.Stop)</b> |
|---|------------------------------------------------------------|------------------------------------------------------|------------------------------------------------------|----------------------------------------------------------------|---------------------------------------------------------------|-----------------------------------------------------|------------------------------------------------------|---------------------------------------------------------------|------------------------------------------------------|------------------------------------------------------|------------------------------------------------------|
| 1 | <i>Sphingopyxis</i><br><i>alaskensis</i><br>(RB2256)       | 1158<br>(ATG.<br>.TGA)                               | 1479<br>(ATG.<br>.TAA)                               | Overlap<br>(4 bp)                                              | Gap<br>(35 bp)                                                | 582<br>(ATG.<br>.TGA)                               | 984<br>(ATG.<br>.TGA)                                | Overlap<br>(1 bp)                                             | 762<br>(ATG.<br>.TGA)                                | 519<br>(ATG.<br>.TAA)                                | None                                                 |
| 2 | <i>Sphingopyxis</i><br><i>macrogoltabida</i><br>(EY-1)     | 1158<br>(ATG.<br>.TGA)                               | 1476<br>(ATG.<br>.TAA)                               | Overlap<br>(4 bp)                                              | Gap<br>(98 bp)                                                | 582<br>(ATG.<br>.TAA)                               | 951<br>(ATG.<br>.TGA)                                | Overlap<br>(1 bp)                                             | 771<br>(GTG.<br>.TGA)                                | 519<br>(ATG.<br>.TAG)                                | None                                                 |
| 3 | <i>Sphingopyxis</i><br><i>fribergensis</i><br>(Kp5.2)      | 1158<br>(ATG.<br>.TGA)                               | 1473<br>(ATG.<br>.TGA)                               | Overlap<br>(4 bp)                                              | Gap<br>(116 bp)                                               | 582<br>(ATG.<br>.TAA)                               | 960<br>(ATG.<br>.TGA)                                | Overlap<br>(1 bp)                                             | 768<br>(ATG.<br>.TGA)                                | 519<br>(ATG.<br>.TAA)                                | None                                                 |
| 4 | <i>Sphingomonas</i><br><i>sanxanigenens</i><br>(DSM 19645) | 1182<br>(ATG.<br>.TGA)                               | 1485<br>(ATG.<br>.TGA)                               | Overlap<br>(4 bp)                                              | Gap<br>(28 bp)                                                | 579<br>(ATG.<br>.TGA)                               | 939<br>(GTG.<br>.TGA)                                | Overlap<br>(4 bp)                                             | 798<br>(GTG.<br>.TGA)                                | 519<br>(ATG.<br>.TGA)                                | None                                                 |
| 5 | <i>Sphingorhabdus</i> sp.<br>(M41)                         | 1167<br>(ATG.<br>.TGA)                               | 1512<br>(ATG.<br>.TGA)                               | Gap<br>(13 bp)                                                 | <i>log</i> is<br>off-<br>located                              | 570<br>(TTG.<br>.TGA)                               | 936<br>(ATG.<br>.TAG)                                | <i>crtB</i> is<br>separated<br>from <i>crtI</i><br>by 75 bp   | 765<br>(ATG.<br>.TGA)                                | 516<br>(ATG.<br>.TAG)                                | None                                                 |
| 6 | <i>Sphingopyxis</i> sp.<br>(113P3)                         | 1161<br>(ATG.<br>.TGA)                               | 1476<br>(ATG.<br>.TAG)                               | Overlap<br>(4 bp)                                              | Gap<br>(35 bp)                                                | 582<br>(ATG.<br>.TGA)                               | 960<br>(ATG.<br>.TGA)                                | Overlap<br>(1 bp)                                             | 759<br>(ATG.<br>.TGA)                                | 519<br>(ATG.<br>.TAG)                                | None                                                 |
| 7 | <i>Sphingopyxis</i> <i>terrae</i><br>(NBRC 15098)          | 1158<br>(ATG.<br>.TGA)                               | 1473<br>(ATG.<br>.TGA)                               | Overlap<br>(4 bp)                                              | Overlap<br>(1 bp)                                             | 582<br>(ATG.<br>.TAA)                               | 972<br>(ATG.<br>.TGA)                                | Overlap<br>(1 bp)                                             | 789<br>(ATG.<br>.TGA)                                | 519<br>(ATG.<br>.TGA)                                | None                                                 |
| 8 | <i>Sphingobium</i> sp.<br>(SYK-6)                          | 1164<br>(ATG.<br>.TGA)                               | 1479<br>(ATG.<br>.TGA)                               | Overlap<br>(4 bp)                                              | Overlap<br>(4 bp)                                             | 591<br>(ATG.<br>.TGA)                               | 966<br>(GTG.<br>.TGA)                                | Gap<br>(36 bp)                                                | 750<br>(ATG.<br>.TGA)                                | 525<br>(ATG.<br>.TAG)                                | None                                                 |
| 9 | <i>Sphingomonas</i><br><i>hengshuiensis</i><br>(WHSC-8)    | 1182<br>(ATG.<br>.TGA)                               | 1476<br>(ATG.<br>.TAA)                               | Overlap<br>(4 bp)                                              | Gap<br>(1 bp)                                                 | 582<br>(TTG.<br>.TGA)                               | 936<br>(ATG.<br>.TAG)                                | Gap<br>(17 bp)                                                | 789<br>(GTG.<br>.TGA)                                | 501<br>(ATG.<br>.TGA)                                | None                                                 |

|    |                                                        |                                         |                                         |                   |                                  |                                        |                                         |                                                        |                                        |                                        |                                        |
|----|--------------------------------------------------------|-----------------------------------------|-----------------------------------------|-------------------|----------------------------------|----------------------------------------|-----------------------------------------|--------------------------------------------------------|----------------------------------------|----------------------------------------|----------------------------------------|
| 10 | <i>Sphingomonas</i> sp.<br>(Root241)                   | 1161<br>( <b>ATG.</b><br>. <b>TGA</b> ) | 1479<br>( <b>ATG.</b><br>. <b>TGA</b> ) | Overlap<br>(4 bp) | Overlap<br>(4 bp)                | 582<br>( <b>ATG.</b><br>. <b>TGA</b> ) | 957<br>( <b>GTG.</b><br>. <b>TAA</b> )  | Overlap<br>(4 bp)                                      | 750<br>( <b>ATG.</b><br>. <b>TAG</b> ) | 501<br>( <b>ATG.</b><br>. <b>TGA</b> ) | None                                   |
| 11 | <i>Sphingomonas</i> sp.<br>(ATCC 31555)                | 1158<br>( <b>ATG.</b><br>. <b>TGA</b> ) | 1479<br>( <b>ATG.</b><br>. <b>TGA</b> ) | Overlap<br>(1 bp) | Gap<br>(171 bp)                  | 582<br>( <b>ATG.</b><br>. <b>TAA</b> ) | 924<br>( <b>ATG.</b><br>. <b>TAA</b> )  | Overlap<br>(1 bp)                                      | 798<br>( <b>ATG.</b><br>. <b>TGA</b> ) | 501<br>( <b>ATG.</b><br>. <b>TGA</b> ) | 786<br>( <b>ATG.</b><br>. <b>TGA</b> ) |
| 12 | <i>Sphingomonas paucimobilis</i><br>(NBRC 13935)       | 1173<br>( <b>ATG.</b><br>. <b>TGA</b> ) | 1476<br>( <b>GTG.</b><br>. <b>TAA</b> ) | Overlap<br>(4 bp) | Gap<br>contains<br>3 ORFs        | 582<br>( <b>ATG.</b><br>. <b>TGA</b> ) | 951<br>( <b>GTG.</b><br>. <b>TAG</b> )  | Overlap<br>(4 bp)                                      | 816<br>( <b>GTG.</b><br>. <b>TGA</b> ) | 540<br>( <b>ATG.</b><br>. <b>TAA</b> ) | None                                   |
| 13 | <i>Sphingomonas astaxanthinifaciens</i><br>(DSM 22298) | 1143<br>( <b>ATG.</b><br>. <b>TGA</b> ) | 1464<br>( <b>GTG.</b><br>. <b>TGA</b> ) | Overlap<br>(4 bp) | <i>log</i> is<br>off-<br>located | 582<br>( <b>GTG.</b><br>. <b>TAG</b> ) | 939<br>( <b>GTG.</b><br>. <b>TGA</b> )  | <i>crtB</i><br>overlaps<br>with <i>crtI</i><br>by 4 bp | None                                   | 531<br>( <b>ATG.</b><br>. <b>TGA</b> ) | 777<br>( <b>ATG.</b><br>. <b>TGA</b> ) |
| 14 | <i>Sphingobium chlorophenicum</i><br>(L-1)             | 1152<br>( <b>ATG.</b><br>. <b>TGA</b> ) | 1482<br>( <b>ATG.</b><br>. <b>TAG</b> ) | Gap<br>(13 bp)    | Gap<br>(1 bp)                    | 582<br>( <b>ATG.</b><br>. <b>TGA</b> ) | 954<br>( <b>ATG.</b><br>. <b>TGA</b> )  | Gap<br>(363 bp)                                        | 726<br>( <b>ATG.</b><br>. <b>TGA</b> ) | 504<br>( <b>ATG.</b><br>. <b>TAG</b> ) | None                                   |
| 15 | <i>Sphingobium</i> sp.<br>(MI1205)                     | 1152<br>( <b>ATG.</b><br>. <b>TGA</b> ) | 1482<br>( <b>ATG.</b><br>. <b>TGA</b> ) | Overlap<br>(1 bp) | Overlap<br>(4 bp)                | 582<br>( <b>GTG.</b><br>. <b>TGA</b> ) | 960<br>( <b>ATG.</b><br>. <b>TGA</b> )  | Gap<br>(40 bp)                                         | 729<br>( <b>ATG.</b><br>. <b>TGA</b> ) | 513<br>( <b>ATG.</b><br>. <b>TGA</b> ) | None                                   |
| 16 | <i>Sphingobium</i> sp.<br>(EP60837)                    | 1152<br>( <b>ATG.</b><br>. <b>TGA</b> ) | 1482<br>( <b>ATG.</b><br>. <b>TGA</b> ) | Overlap<br>(1 bp) | Overlap<br>(4 bp)                | 582<br>( <b>TTG.</b><br>. <b>TAG</b> ) | 960<br>( <b>ATG.</b><br>. <b>TGA</b> )  | Gap<br>(37 bp)                                         | 729<br>( <b>ATG.</b><br>. <b>TGA</b> ) | 513<br>( <b>ATG.</b><br>. <b>TAG</b> ) | None                                   |
| 17 | <i>Sphingobium</i> sp.<br>(YBL2)                       | 1161<br>( <b>ATG.</b><br>. <b>TGA</b> ) | 1482<br>( <b>ATG.</b><br>. <b>TGA</b> ) | Gap<br>(13 bp)    | Gap<br>(12 bp)                   | 582<br>( <b>ATG.</b><br>. <b>TGA</b> ) | 954<br>( <b>ATG.</b><br>. <b>TGA</b> )  | Gap<br>(354 bp)                                        | 714<br>( <b>ATG.</b><br>. <b>TAG</b> ) | 510<br>( <b>ATG.</b><br>. <b>TGA</b> ) | None                                   |
| 18 | <i>Novosphingobium aromaticivorans</i><br>(DSM 12444)  | 1197<br>( <b>ATG.</b><br>. <b>TGA</b> ) | 1479<br>( <b>ATG.</b><br>. <b>TGA</b> ) | Overlap<br>(4 bp) | Overlap<br>(4 bp)                | 582<br>( <b>GTG.</b><br>. <b>TGA</b> ) | 972<br>( <b>ATG.</b><br>. <b>TGA</b> )  | Gap<br>(4 bp)                                          | 711<br>( <b>ATG.</b><br>. <b>TGA</b> ) | 519<br>( <b>ATG.</b><br>. <b>TAG</b> ) | None                                   |
| 19 | <i>Citromicrobium</i> sp.<br>(JL477)                   | 1212<br>( <b>ATG.</b><br>. <b>TGA</b> ) | 1503<br>( <b>ATG.</b><br>. <b>TGA</b> ) | Overlap<br>(8 bp) | Gap<br>(299 bp)                  | 588<br>( <b>ATG.</b><br>. <b>TGA</b> ) | 975<br>( <b>GTG.</b><br>. <b>TAG</b> )  | Gap<br>(32 bp)                                         | 723<br>( <b>ATG.</b><br>. <b>TGA</b> ) | 519<br>( <b>ATG.</b><br>. <b>TAG</b> ) | None                                   |
| 20 | <i>Altererythrobacter dongtanensis</i><br>(KCTC 22672) | 1182<br>( <b>ATG.</b><br>. <b>TGA</b> ) | 1494<br>( <b>TTG.</b><br>. <b>TGA</b> ) | Overlap<br>(4 bp) | Overlap<br>(4 bp)                | 582<br>( <b>GTG.</b><br>. <b>TGA</b> ) | 1026<br>( <b>CTG.</b><br>. <b>TGA</b> ) | Gap<br>(61 bp)                                         | 714<br>( <b>ATG.</b><br>. <b>TGA</b> ) | 519<br>( <b>ATG.</b><br>. <b>TAG</b> ) | None                                   |

|    |                                                           |                                |                                |                   |                                             |                               |                                |                   |                               |                               |                               |
|----|-----------------------------------------------------------|--------------------------------|--------------------------------|-------------------|---------------------------------------------|-------------------------------|--------------------------------|-------------------|-------------------------------|-------------------------------|-------------------------------|
| 21 | <i>Altererythrobacter namhicola</i><br>(JCM 16345)        | 1209<br>( <b>ATG.</b><br>.TGA) | 1527<br>( <b>ATG.</b><br>.TGA) | Overlap<br>(4 bp) | Overlap<br>(1 bp)                           | 606<br>( <b>ATG.</b><br>.TGA) | 1035<br>( <b>ATG.</b><br>.TAA) | Gap<br>(44 bp)    | 720<br>( <b>ATG.</b><br>.TGA) | 501<br>( <b>ATG.</b><br>.TGA) | 789<br>( <b>ATG.</b><br>.TGA) |
| 22 | <i>Altererythrobacter epoxidivorans</i><br>(CGMCC 1.7731) | 1185<br>( <b>ATG.</b><br>.TGA) | 1572<br>( <b>ATG.</b><br>.TGA) | Gap<br>(6 bp)     | Gap<br>(8 bp)                               | 582<br>( <b>ATG.</b><br>.TAA) | 1026<br>( <b>CTG.</b><br>.TGA) | Gap<br>(61 bp)    | 735<br>( <b>ATG.</b><br>.TGA) | 522<br>( <b>ATG.</b><br>.TAA) | None                          |
| 23 | <i>Altererythrobacter atlanticus</i><br>(26DY36)          | 1182<br>( <b>ATG.</b><br>.TGA) | 1506<br>( <b>ATG.</b><br>.TGA) | Overlap<br>(4 bp) | Overlap<br>(4 bp)                           | 582<br>( <b>GTG.</b><br>.TAA) | 1026<br>( <b>CTG.</b><br>.TGA) | Gap<br>(43 bp)    | 717<br>( <b>ATG.</b><br>.TGA) | 519<br>( <b>ATG.</b><br>.TGA) | None                          |
| 24 | <i>Altererythrobacter ishigakiensis</i><br>(NBRC 107699)  | 1209<br>( <b>ATG.</b><br>.TGA) | 1563<br>( <b>ATG.</b><br>.TGA) | Overlap<br>(4 bp) | Overlap<br>(4 bp)                           | 582<br>( <b>CTG.</b><br>.TGA) | 948<br>( <b>GTG.</b><br>.TAG)  | Overlap<br>(4 bp) | 723<br>( <b>ATG.</b><br>.TGA) | 501<br>( <b>ATG.</b><br>.TAA) | 768<br>( <b>ATG.</b><br>.TGA) |
| 25 | <i>Erythrobacter litoralis</i><br>(HTCC2594)              | 1203<br>( <b>ATG.</b><br>.TGA) | 1506<br>( <b>ATG.</b><br>.TGA) | Overlap<br>(4 bp) | Overlap<br>(4 bp)                           | 582<br>( <b>ATG.</b><br>.TGA) | 1026<br>( <b>CTG.</b><br>.TAG) | Gap<br>(56 bp)    | 723<br>( <b>ATG.</b><br>.TAG) | 501<br>( <b>ATG.</b><br>.TGA) | 768<br>( <b>ATG.</b><br>.TGA) |
| 26 | <i>Erythrobacter atlanticus</i><br>(s21-N3)               | 1197<br>( <b>ATG.</b><br>.TGA) | 1497<br>( <b>ATG.</b><br>.TAG) | Overlap<br>(4 bp) | Gap<br>(98 bp)                              | 582<br>( <b>ATG.</b><br>.TGA) | 1047<br>( <b>GTG.</b><br>.TGA) | Gap<br>(35 bp)    | 726<br>( <b>ATG.</b><br>.TGA) | 519<br>( <b>ATG.</b><br>.TGA) | None                          |
| 27 | <i>Sphingobium yanoikuyae</i><br>(ATCC 51230)             | 1149<br>( <b>GTG.</b><br>.TGA) | 1482<br>( <b>ATG.</b><br>.TGA) | Overlap<br>(1 bp) | Gap<br>(31 bp)                              | 582<br>( <b>ATG.</b><br>.TGA) | 990<br>( <b>ATG.</b><br>.TGA)  | Gap<br>(54 bp)    | 741<br>( <b>ATG.</b><br>.TGA) | 519<br>( <b>ATG.</b><br>.TAG) | None                          |
| 28 | <i>Novosphingobium</i><br>sp.<br>(PP1Y)                   | 1227<br>( <b>ATG.</b><br>.TGA) | 1479<br>( <b>ATG.</b><br>.TGA) | Overlap<br>(4 bp) | Gap<br>(435 bp,<br>contains<br>an ORF)      | 582<br>( <b>ATG.</b><br>.TGA) | 954<br>( <b>ATG.</b><br>.TAG)  | Gap<br>(37 bp)    | 723<br>( <b>TTG.</b><br>.TGA) | 519<br>( <b>ATG.</b><br>.TGA) | None                          |
| 29 | <i>Novosphingobium pentaromativorans</i><br>(US6-1)       | 1227<br>( <b>ATG.</b><br>.TGA) | 1479<br>( <b>ATG.</b><br>.TGA) | Overlap<br>(4 bp) | Gap<br>(435 bp,<br>contains<br>JI59_14785)  | 582<br>( <b>ATG.</b><br>.TGA) | 954<br>( <b>ATG.</b><br>.TAG)  | Gap<br>(37 bp)    | 723<br>( <b>TTG.</b><br>.TGA) | 519<br>( <b>ATG.</b><br>.TGA) | None                          |
| 30 | <i>Porphyrobacter neustonensis</i><br>(DSM 9434)          | 1278<br>( <b>ATG.</b><br>.TGA) | 1563<br>( <b>ATG.</b><br>.TGA) | Overlap<br>(4 bp) | Gap<br>(432 bp,<br>contains<br>A9D12_07630) | 582<br>( <b>ATG.</b><br>.TAG) | 966<br>( <b>ATG.</b><br>.TGA)  | Gap<br>(11 bp)    | 774<br>( <b>ATG.</b><br>.TGA) | 540<br>( <b>ATG.</b><br>.TAA) | 804<br>( <b>ATG.</b><br>.TGA) |

|    |                                                    |                                |                                |                   |                                                             |                               |                                |                                                            |                               |                               |                               |
|----|----------------------------------------------------|--------------------------------|--------------------------------|-------------------|-------------------------------------------------------------|-------------------------------|--------------------------------|------------------------------------------------------------|-------------------------------|-------------------------------|-------------------------------|
| 31 | <i>Sphingomonas</i> sp.<br>(NIC1)                  | 1167<br><b>(ATG.<br/>.TAG)</b> | 1476<br><b>(ATG.<br/>.TGA)</b> | Gap<br>(16 bp)    | Gap<br>(832 bp,<br>contains<br>A7E77_09425)                 | 582<br><b>(ATG.<br/>.TGA)</b> | 945<br><b>(CTG.<br/>.TAG)</b>  | Overlap<br>(11 bp)                                         | 813<br><b>(ATG.<br/>.TGA)</b> | 516<br><b>(ATG.<br/>.TAA)</b> | None                          |
| 32 | <i>Sphingomonas melonis</i><br>(TY)                | 1167<br><b>(ATG.<br/>.TAG)</b> | 1476<br><b>(ATG.<br/>.TGA)</b> | Gap<br>(16 bp)    | Gap<br>(1035 bp,<br>contains<br>BJP26_05330<br>BJP26_05335) | 582<br><b>(ATG.<br/>.TGA)</b> | 945<br><b>(CTG.<br/>.TAG)</b>  | Overlap<br>(11 bp)                                         | 813<br><b>(ATG.<br/>.TGA)</b> | 516<br><b>(ATG.<br/>.TAA)</b> | None                          |
| 33 | <i>Altererythrobacter marensis</i><br>(KCTC 22370) | 1182<br><b>(ATG.<br/>.TGA)</b> | 1563<br><b>(ATG.<br/>.TGA)</b> | Overlap<br>(4 bp) | Gap<br>(510 bp,<br>contains<br>AM2010_157)                  | 582<br><b>(ATG.<br/>.TGA)</b> | 1041<br><b>(CTG.<br/>.TAG)</b> | Gap<br>(61 bp)                                             | 723<br><b>(ATG.<br/>.TAG)</b> | 519<br><b>(ATG.<br/>.TGA)</b> | None                          |
| 34 | <i>Croceicoccus naphthovorans</i><br>(PQ-2)        | 1197<br><b>(ATG.<br/>.TGA)</b> | 1491<br><b>(ATG.<br/>.TGA)</b> | Gap<br>(11 bp)    | <i>log</i> is<br>off-<br>located                            | 570<br><b>(TTG.<br/>.TAA)</b> | 987<br><b>(GTG.<br/>.TGA)</b>  | <i>crtB</i> is<br>separated<br>from <i>crtI</i><br>by 4 bp | 753<br><b>(ATG.<br/>.TGA)</b> | 525<br><b>(ATG.<br/>.TGA)</b> | None                          |
| 35 | <i>Sphingomonas taxi</i><br>(ATCC 55669)           | 1167<br><b>(ATG.<br/>.TAA)</b> | 1476<br><b>(ATG.<br/>.TAG)</b> | Gap<br>(25 bp)    | <i>log</i> and<br><i>crtB</i> are<br>off-located            | 582<br><b>(ATG.<br/>.TAG)</b> | 951<br><b>(CTG.<br/>.TAA)</b>  | Overlap<br>(11 bp)                                         | 825<br><b>(ATG.<br/>.TGA)</b> | 468<br><b>(GTG.<br/>.TGA)</b> | 717<br><b>(ATG.<br/>.TGA)</b> |
| 36 | <i>Sphingomonas</i> sp.<br>(RIT328)                | 1167<br><b>(ATG.<br/>.TGA)</b> | 1476<br><b>(ATG.<br/>.TAG)</b> | Gap<br>(23 bp)    | <i>log</i> and<br><i>crtB</i> are<br>off-located            | 582<br><b>(ATG.<br/>.TAG)</b> | 948<br><b>(CTG.<br/>.TGA)</b>  | Overlap<br>(11 bp)                                         | 819<br><b>(ATG.<br/>.TGA)</b> | 468<br><b>(ATG.<br/>.TGA)</b> | 711<br><b>(ATG.<br/>.TAG)</b> |
| 37 | <i>Sphingobium japonicum</i><br>(UT26S)            | 1161<br><b>(ATG.<br/>.TGA)</b> | 1482<br><b>(ATG.<br/>.TAA)</b> | Gap<br>(13 bp)    | Gap<br>(9 bp)                                               | 582<br><b>(ATG.<br/>.TGA)</b> | 954<br><b>(ATG.<br/>.TGA)</b>  | <i>crtB</i> is<br>off-<br>located                          | 726<br><b>(ATG.<br/>.TGA)</b> | 510<br><b>(ATG.<br/>.TGA)</b> | None                          |
| 38 | <i>Sphingomonas</i> sp.<br>(MM-1)                  | 1185<br><b>(ATG.<br/>.TGA)</b> | 1479<br><b>(ATG.<br/>.TGA)</b> | Overlap<br>(4 bp) | Gap<br>(51 bp)                                              | 582<br><b>(ATG.<br/>.TGA)</b> | None                           |                                                            | None                          | None                          | None                          |
| 39 | <i>Sphingobium baderi</i><br>(DE-13)               | None                           | 1482<br><b>(ATG.<br/>.TGA)</b> |                   | Overlap<br>(4 bp)                                           | 582<br><b>(GTG.<br/>.TAA)</b> | None                           |                                                            | None                          | None                          | None                          |

|                                                                       |                                     |                        |      |                                               |                       |      |  |      |      |      |
|-----------------------------------------------------------------------|-------------------------------------|------------------------|------|-----------------------------------------------|-----------------------|------|--|------|------|------|
| 40                                                                    | <i>Sphingomonas wittichii</i> (RW1) | 1143<br>(ATG.<br>.TGA) | None | <i>crtY</i> and <i>log</i> overlap<br>by 4 bp | 591<br>(ATG.<br>.TAG) | None |  | None | None | None |
| 41                                                                    | <i>Sphingopyxis granuli</i> (TFA)   | None                   | None |                                               | 582<br>(ATG.<br>.TGA) | None |  | None | None | None |
| Serial numbers in the first column are the same as in Tables 1 and S1 |                                     |                        |      |                                               |                       |      |  |      |      |      |

### Overlaps among *crtB*, *log*, and *crtI*

In bacteria that contain *crt* loci, *crtB* usually occurs immediately downstream of *crtI*, and in some cases their reading frames overlap. Whereas the two ORFs overlapped by 4 bp in strain DSM 22298, they were separated by 4 and 75 bp in strains PQ2 and M41, respectively (Table S2). Surprisingly, in the genomes of 24 strains of *Sphingomonadales*, an unusual ORF was present between *crtI* and *crtB* (Figs. 1 and S1). In nine of the 24 strains, the reading frames of *crtB* and *log* overlapped by 1–4 bp, with 1 bp being the most common overlap (Table S2). In 15 strains where *crtB* and *log* occur together without an overlap of the reading frames, their separation range was 4–363 bp (Figs. 1 and S1; Table S2), indicating that *crtB* could be transcribed independently in some of them. Furthermore, in 11 of the 24 strains, the reading frames of *crtI* and *log* overlapped by 1–4 bp, with 4 bp being the most common overlap (Table S2). In 13 strains where *crtI* and *log* occur together without an overlap of the reading frames, their separation range was 1–299 bp (Figs. 1 and S1; Table S2), indicating that *log* could be transcribed independently in some of them. Interestingly, in 11 of the 24 strains, the reading frame of *crtY* overlapped with that of *crtI*, and the reading frame of *crtI* overlapped with that of *log*. However, only in 3 (*Sphingopyxis terrae* NBRC 15098, *Sphingomonas* sp. Root241, and *Altererythrobacter ishigakiensis* NBRC



107699) of the 24 strains, the reading frame of *crtY/crtI/log* overlapped with that of *crtI/log/crtB*, respectively (thus forming a putative *crtY–crtI–log–crtB* operon).

In the genomes of 6 strains, the *crtY–crtI* and *log–crtB* pairs were separated by 1–2 ORFs (Figs. 1 and S1; Table S2). In two of these strains (*Sphingomonas* sp NIC1 and *Sphingomonas melonis* TY), the reading frames of *log* and *crtB* overlapped by 11 bp, and in the other four, they were separated by 11–61 bp. In the genomes of *Sm. taxi* ATCC 55669 and *Sphingomonas* sp. RIT328, the *log–crtB* pair was located away from the *crt* locus (Figs. 1 and S1) and their reading frames overlapped by 11 bp (Table S2). Furthermore, in the genomes of *Sb. japonicum* UT26S, *Sphingomonas* sp. MM-1, and *Sb. baderi* DE-13, *log* was found immediately downstream of *crtI* (Figs. 1 and S1). Whereas the reading frames of *crtI* and *log* overlapped by 4 bp in *Sb. baderi* DE-13, they were separated by 9 and 51 bp in the other two strains.

### **Overlaps among *crtZ* and *crtW***

In four strains (JCM 16345, NBRC 107699, HTCC2594, and DSM 9434, which were members of *Erythrobacteraceae*), *crtW* was located immediately upstream of *crtZ* (Figs. 1 and S1), and their reading frames overlapped by 4 bp. Conversely, in two strains (ATCC 55669 and RIT328, which were members of *Sphingomonas*), *crtW* was located immediately downstream of *crtZ* (Figs. 1 and S1). Whereas the reading frames of *crtW* and *crtZ* overlapped by 4 bp in strain ATCC 55669, they were separated by 7 bp in strain RIT328. Therefore, it is likely that there is transcriptional and/or translational coupling of *crtW* and *crtZ* in these strains.

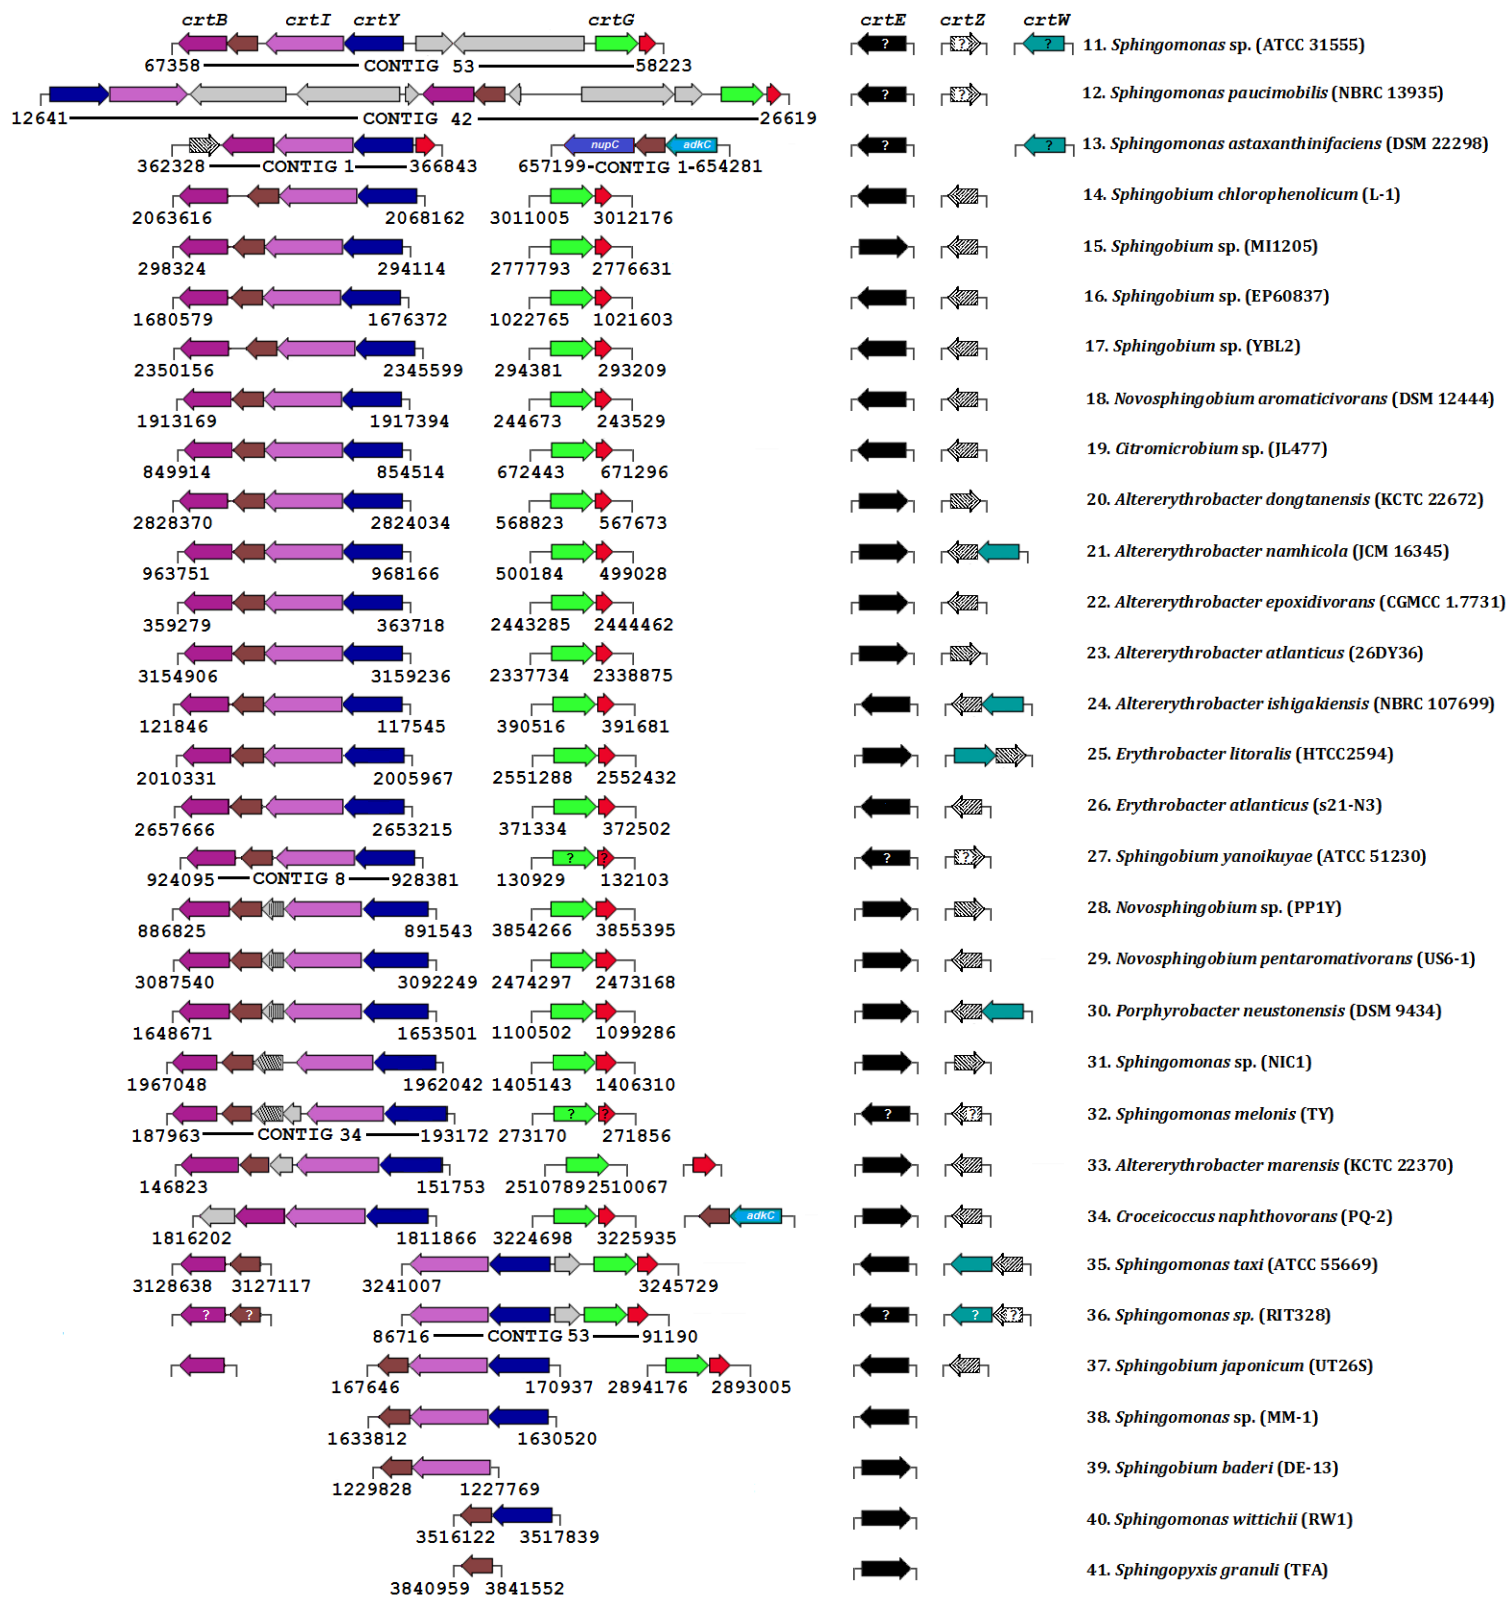

**Fig. S1.** Comparison of *crt* ORFs/loci in 31 strains of *Sphingomonadales*. Serial numbers of the bacteria are the same as in Table 1. The *crt* ORF that each color-coded or shaded arrow represents is indicated on the top. The brown and red arrows represent ORFs encoding the putative LOG and DUF2141 proteins, respectively. The gray arrows represent the *separating* ORFs that are unlikely to be involved in carotenoid biosynthesis. Numbers at the beginning and end of gene clusters indicate the coordinates within each genome or contig. In the case of *crtE*, *crtZ*, and *crtW*, arrows pointing to the right indicate that they were located on the *plus* strand, while those pointing to the left indicate that they were located on the *minus* strand. In serial numbers 14, 22, 23, and 28, *crtY* was located on the *minus* strand, but *crtG* was located on the *plus* strand. In serial numbers 15, 16, 17, and 20, *crtY* was located on the *plus* strand, but *crtG* was located on the *minus* strand. In serial numbers 18, 19, 21, 29, 30, and 33, *crtY* and *crtG* were located on the *minus* strand. In serial numbers 24, 25, 26, 31, and 34, *crtY* and *crtG* were located on the *plus* strand. In *Sphingomonas taxi* (serial number 35), *crtY* was located on the *minus* strand, but *crtB* was located on the *plus* strand. In *Sphingobium japonicum* (serial number 37), *crtY* and *crtG* were located on the *minus* strand, but *crtB* was located on the *plus* strand. The uncertainty of the location of some of the ORFs on the *plus* or *minus* strands in the draft genomes of serial numbers 11, 12, 13, 27, 32, and 36 is denoted by a '?' within the respective arrows.

## *Sphingomonas* sp. ATCC 31555 locus tags and sequences

### **Sphi55\_0001, 302 aa, WP\_019370787**

MASVTHASLALLESALRQVAEEIDAQFDRLLLEVPDDPRADLYRAMRHAAIIGGGKRLRPLLVFATAQLFAVD  
KSCAARVATALECIHVYSLIHDDLPMDDDDMRGKPTVHKAFFEATAILAGDCLHDLAFELLAHEATHP  
DPFVVRVDLISELARASGPSMAGGQMMDLAEKASFDLATVTRLQAMKTGALISCAVECAAAILGRVAPEG  
RTGLRGYARDIGLAFQIVDDILD AEGDEALVGKKLGKGDAGKETFLSLLGIDRAREQARMLVDQAITHL  
HAYGPEADLLRDIARFTLERDR

### **Sphi55\_0002, 307 aa, WP\_019370947**

MRFPGRDAIVATAGESIARGSRSF AAASKLFDPKTRERAWLLYAWCRRCDIADGQDHGHGTMVVVEDPQA  
RLAEVRERTAAALAGEWVGDAAFDALRIVAQETGMPHRFAWDLIDGFALDADGWQPTNEDDLLRYCYHVA  
GVVGCMMAVVMGVQPEDEAVLDRACDLGLAFQLANIARDIGEDAEAGRCYLPAAWLAEVGLTADNPLADR  
SALAILGTRLADRAEAYEISARGGAAALSFRSAWAVLAAADIYGGIARKVRARGAGAWESRTTTS GGEKL  
AAIGGAWIAAWKRAPTRPAGLWTRPR

### **Sphi55\_0003, 193 aa, WP\_019370946**

MKRIAVYCGSASPANPVYIEAARTLGRTLAERGIGVVYGGGRLGLMGAVADAALAEAGGEVIGVIP TLLVN  
AEVAHRGLTSLEVCETMHERKARFTELADGFVNLPGGTGTMDLWEAMSWAQLGYHADPIGLLNIAGYYD  
KLVEFWEHMGTVGFVRSQHQLLLVDSTIDGLLAKMADAQPIVPIAQLRRDQL

### **Sphi55\_0004, 492 aa, WP\_019370945**

MRRAAVIGAGFGGLALAIRLQSAGVDTTLIEARDKPGGRAYWDRDGFIFDGGPTVITDPDALKELWRLS  
GHDISEDVTCLKPVTPFYRLSWPDGTTFDYTNDDAVLAGEIAKLDASDIAGYRKFLYSEVYQEGYVKLG  
AKAFDFKSMKKAAPALMQNAWRSVYSIVSSFVKNEKLRREALSFHTLLVGGNPMATSSIYALIHKLERD  
GGVWVAEGGTNRLVAGMIRHFERLGGAVRIGDPVDEILTLGDRVTGLRTRKSGFELEVD AVASNADIVHSY  
RDLLRNSRSARRTAGRLVNKRFSPSLFVVHFGLRGTFPDI PHHMLFGPRYKGLLDDIYTHGVISEDFSL  
YLHHPASDASMAPEGHSTFYVLA PVPHLGKFPADWSEVGP ILEQRILAEVQRRLIPDLADRI VTKFHYA  
PTDFRDDLAAHHGSGFSLEPILTQSAWFRVHNRDDAISNLYFVGAGTHPGAGIPGVVGS AKATAELMLGE  
MV

### **Sphi55\_0005, 385 aa, WP\_019370944**

MPSTISCDVAIVGGGLAGGLIALAIRKKKPHCSVRLIEGSARI GGNHLWSFFADDVAPEHRWLAAPLISH  
GWSNYDVAFPGHSRTL PARYYSVESEHFDRVVREALGPKGLLLGREAADITPNAVALADGDLVEADGVID  
CRGVGDTSALQLGWQKFHGAELALALNTVQRPLIMDATVPQIDGYRFVYCLPFSPTRMFVEDTYYS DTP  
SIDLLATGARIEAYADAAGWQVERVLREEVGS LVPVAMGGDHAAYWAAGGRGI AKAGMKAGLFHPMTGYSF  
PDAVRTAALIAEEKDYSGEALHQMLYGYSRGLWRKRGFYRMLAAMLFKAAEPEERYVLERFYRLDAGLI  
QRFYAGQSTWGDVRVLSGKPPVPIGRALSAINR

### **Sphi55\_0006, 166 aa, WP\_019369087**

MSLPTGIALFVVTVLGMELFAYAAHRWIMHGPGWFLHASHHRPRTGNWEWNDLYAAIFAVPSFVLLL GGA  
HLGWWTGAWIGAGIAAYGMIYFGFHD LIVHKRVRHRYIPRSSYMKRIVQAHRLHHAVHTRKGTVSFGFL  
YAPRPEVLKAQLRSSGALTQSSTIPD

### **Sphi55\_0007, 265 aa, WP\_019370940**

MDIALALLTSAVVMTVIVGVRYLAASAGFALATRLRHPGLYAGLDRQIRKEIGWSLASTAIYGI PAGIVA  
WGWAQGWTRIYDDVHAWPLWYLPVSAFLYLFLHDSWFYWTHR AMHPALFRRYHAVHHASRPPTAWAAM  
SFHWGEALS GAIVIPLLVFVPIHVAALGLVLTIMTVMGVTNHMGWEIFPAWLWRGPVGAWVITASHHQR  
HHERYGCNYGLYFRFWDRLCGTDQGLGQFQGT PRARRAGSVPDTGRRIATGDAGD

### **Sphi55\_0008, 128 aa, WP\_026009371**

MGGGSPLATLEIDFVKLRSSRGLLQVC IAPAPSVFPDCRDGGGAIKRSIPASAGQLRVTGLAPGDYAVAV  
IHDANGNGKLDTMMGI PREGFGFSRNP AIGFGPPRF TAAQFPLTGGSDRQEV MRMYLL

### **Sphi55\_0009, 261 aa, WP\_037513166**

MTRLEAPRDEGRQGRCGIDAQDKRVAQRGRWIAAAIGGAWLAVHVGCIFFWRWSIAAAPLAVFIVLLQAW  
LSTGLFIVAHDCMHGSLAPGRPRWNAVVGALCLGAYAGLSYAVLLPKHHAHHAAPGSADDPDFHADAPQR  
ALPWFSGSFFRTYYTHGQLARITAAAIYVLLL GASLLNIVVFWAVPALLALGQLFLFGTYLPHRHDGRPFA  
DKHHARSNTLGPMLSLITCFHFH GAYHHEHHLSPGTPWWRLPALRRERLARR

## *Sphingomonas astaxanthinifaciens* DSM 22298 locus tags and sequences

### **Sasta\_0001, 301 aa, WP\_029942171**

MASVAEATDLLSEAKRIAAGVDALFEQALADRCDRDRLCAAMRHAGIGGGKRLRPLITVAAARLFAIDEDRALRAGAAIEAIHVYSLIHDDLPCMDDDDLRRGKPTVHKAFDEATAVLAGDCFHALAFELLADERTHEDPFVRSSELVLELAKASGIDGMGGGQAMDLAEEGETLDLGAITRLQQLKTGALIEYAVEAAVVMGRVAPEGRARYRGYARNVGLAFQIADDLLDHEGDEEAAGKKLQKDAEAGKATFVSLLGADRARQQAQMLVTQAIEHLHGHEEADLLRAIARYAVERDR

### **Sasta\_0002, 312 aa, WP\_029940286**

MSEADERARLVQAALESISAGSKSFRFASQLFDQOTRERSWLLYSWCRACDDVTDGQTLGHDAERVDDPAARLAFLLKAKTAEAFAGQPTGLVPFDALRVVAAECAIPQAVAGDHLAGFERDAGGWRPTTTDDLLSYCYQVAGAVGVMMAHVMGVPPPEDEDTLNRAADLGIAFQLANIARDIVDDAKVGRVYLPAEWLAAEGLAGADLADPAHRPALARLAHRLADMADAYRRSARVGAARLPFRSRWAVLAASGIYGEIATRAAALGPRAWDERITTSKAEKAALVMEAFWEALWVRPAPRDGLWTRPAHA

### **Sasta\_0003, 193 aa, WP\_037504354**

MSHNLKRIAVYCGSAPGNPAYADAVALIRAMAGQGIDLVIYGGGKLGMLLIADTMLEAGGEVHGVIPALVDKEVAHLGLTELHQVAGMHERKAKMTELCDAFVCLPGGIGTLDLFEAWTWNALGYHAKPFCLLNNGFWNGLGTFMDHVAGAGFLSQARREQLLLAESPAEAINKLDEAARTATQGMVW

### **Sasta\_0004, 487 aa, WP\_029940287**

MKSAIVIGAGFGGLALAIRLQASAGVKTIVEARDRPGGRAYVWEKDGHVFDAGPTVITDPDCLQRLWKLSGHDMSDELVELVPVKPFYRLSWPDGVVFDYTNDDAELKAAMDALNPDDWAGYQRFAYSAGVYNEGYVKLGTKAFESLGDMLKAAPALAKYQAWRSVYSIVSSFVKDEHLRQTLFSHTLLVGGNPMTCSSIYALIHKLRRGGVWFAGGTNKLIAGMVRQFERIGGTIRLGDVPTAILAENDRVTVGRTASGWSATADAVASNGDVVHSYGLIEGSDRGQQVRLKRRKRFSPGLFVLHFGLEGTSDLAHHTILFGPRYGGVNDIYKTGRLATDPSLYIHHPTITDPSMAPPGCSTFYALAPVPNAGKADVDWAVEGPKYQEVVLDTIAERLIPDVRQIRITIFHYTPADFSADLAHLGSAFSLPEVWLQSAWFRTHNRDDKLRNLYFVGAGTHPGAGIPGVVGSAAEATAGLMLA

### **Sasta\_0005, 380 aa, WP\_029940288**

MMKRADLVIVGGGLAGLALALRRRRPDLRLLLVPEGPSIGGNHLWSFFESDVAPADRWLTDPLIRHRWPDYEVRFPAHQRHAEAYQTIIESEALDEAVRKALSAAEIVRAEATDLGPTHVTLATGERIEAKAVLDARGKAEGDLGLGWQKFLGQLLTIPOGHGLTRPIVMDATVDQHDGYRFVYCLPFSPTLFEVDYYSYSDGPELDHDLRLDRIGDYAAAQGWQVADRSREEHGALPVVIGGDFDRLWPAADHVARAGARGGFHPLTSYSLPDAVRFAIWLADKATFDARLGAATRARGRRHWRSGAFYRLLTALLFHAAEPGQRYLVLERFYRLSGPLIGRFYAGMSTGYDKARVLAGKPPVFFRALRVLRDSL

### **Sasta\_0006, 176 aa, WP\_029940285**

MSWPAGLALFVSTVLLMEGFAYVLHRFVMHSRLGWNWHESHHRARTGWFERNLDYAVVFALPSILLIWWGLNGGWGDWATWMGAGVAFYGVIIYFGFHDVIVHGRLPHRIVPRSTYFKRIVQAHKLHHAVESRDGAVSFGFLYAPPVERLKQALQASREAQLRRARGGSTARHEERA

### **Sasta\_0008, 151 aa, WP\_051676451**

*MTKRF*TLAATAGLLLSAPVLMQAQAPQAGADLQVHLTGLRSAGVVLHCLSARPKFLDCKADKTALARTVPARAAGRLDLGPVRPGTYALLIVHDENQNGKLDMTLGIPIREGFGFSNNPAMRPRPRWEEIRFTMPATPTTQQIRVRYVL

### **Sasta\_0009, 258 aa, WP\_029942176**

MAERRRPAYMAPMLSDAQRRRQAMIGLGLAAAITAAFVALHVWSVFFLPLEGAGWWLALPIVAVQTWLSVGLFIVAHDAMHGSLAPGRPATNLFWRGLTLLLYAGFWLDRLSPKHFDHRRHVGTERDPDFSVDPTRFWPWYYAFMRRYFGLREYLVNLALVLAIVLVLKPAPLGNLLLFWALPSILSSIQLFYFGTYLPHRHEDAPFADQHNARSNDFFVWLSLLTCFHFGYHREHLSPGTPWWQLPRRRRELALPA

## *Altererythrobacter ishigakiensis* NBRC 107699 locus tags and sequences

### **Altish\_0001, 301 aa, WP\_067599965**

MAAAIDHSFLKDGLSRVQREVDVDFDALLPVPQDSRARLVEAMRYAAIGGGKRVRLPLLLVSTAEELFGVNR  
DSALRAACAVEAIHVYSLIHDDLPCMDDDALRHGKPTLHLEFDEATAVLAGDSLHALAFEILSDTATSE  
PFTRSELILTLGKASGKDGMMAGGQMMDDMAEEEDYDLHTITRLQQLKTGALLAASVEMGAIMGHVQPEGR  
AHLRAYARDIGLAFQIADDLLDVEGDADKAGKALRKDEGQGKQTFVTLMGAGKAREQARALVDQAIGHLS  
VHGDEAKMLAAVARYIVERDR

### **Altish\_0002, 315 aa, WP\_067596482**

MKRDELVEASRLAIKQGSKSFSASRLFDRTTRERVWMLYAWCRRCDDLTDAQDMGGELGDQSDIARVE  
HLRQLTANALAGEETGDIADFAGQVAREVGLTMEADAVIAGFQLDAEDWRPRTEADLMRYCWHVAGAV  
GVMMQVMGVKREDDTLDLRACDLGLAFQLANIARDVVEDDAAAARCYLPAEWLVEEDIEPGQHTKPHRR  
ELADMAARLVRRMEVHAASSRIGAARLPFRCRWAILSAARIYTAIGREVLAKGPAAWDARVYTSKTQKIG  
HAMAAFVEALVNRPPKLDDEPRWRRSDLAENAASA

### **Altish\_0003, 193 aa, WP\_067602122**

MNRLAVYCGSATPDDPRYIELATEVGRALALREIGVVYGGGRLGLMGAVARGALDAGGEVIGVIPEALFN  
SEVANHDCTKLYTVSGMHERKQRFDTLSDGFITIPGGVGTMDDELWEAMSWAQLGYHSPVGLLNTMGFFD  
HLIAFNEKMAEVGFVRPAHQNILIHDTTVGGLIDKMAAYEPHTPIFRMKAEDL

### **Altish\_0004, 520 aa, WP\_067602119**

MNAATPVTPPVRAPIQVDPKAYEGKTACVIGSGFGGMALAIRLQASAGITTTVIEARDKPGGRAYFWEKDG  
FTFDGGPTVVTDPPCLKELWEITGHDMAEDVELMKVMPFYRLNWPDGTFNFDYSNDEDSLNSEIAKLDPGD  
VAGYAEFLKYSEGVRHREGYLKLGTVPFDFKSMKKAAPALVKKQAWRSVYSMVSSYVKSEKLREALSFHT  
LLVGGNPMNTSAIYALIHKLEKDGCVWVTRGGTNRLIAGMVRHFERLGGTMRVGDVAVTQVHTIGNKASEV  
ETESGWKQRFDAVASNADIMHSYRDLLSGSKRGKDYAKSLSRKSFSPGLFVVHFGLEGTWPGIPHHMILF  
GPRYKGLLDDIYKQGVLPQDFSIYLHHPVTVDPSMAPKKGKSTFYALVPVAHMGKLAVDWDEVGPVLEKRI  
LDEIGRRLIPDIHDIRVTKFSYAPKNFAHDLNAHLGSAFSLPEVPLWQSAYLRGHNRRDDVIDNFYLVGAGT  
HPGAGIPGVVGSAKATAGLMLLEDLAIKTTA

### **Altish\_0005, 402 aa, WP\_067596481**

MGGRETDAIVGGGLAGGLIALALHRAQPDLRFQLIEAGETLGGHHRWSWFDSDLGHEGRALLSPFTYVA  
WDQGYEVAFPPQYRRPMRAGYRSLASADFDAALREILPERTLSLQRVCEL DANGVTLQSGERINARTVID  
CRSVLPSQHLLGGWQIFAGRHFYDRPHGITQPMIMDASIDQHAPAGNRSAYRFMYVPLAEDELFFEDT  
YYDEARALDEDLLSRRIDQYAADMGFADGVEIGHERGILPVIITGGNFKAYRASIEIPGVAMAGARGGFSH  
PLTSYTMPPIAVENALAIASHAHLGPELLAHFVRGRANEHWRKTAIYRALGRMLFKATEPERRVNIQRFY  
QLPEELIERFYACHTTLPDQVRILSGKPPVSI PRAIRALASKGKPLLMEKTE

### **Altish\_0006, 166 aa, WP\_067596417**

MSWWEIIAIVLAALLGMEFFAWYAHKYIMHGWGWEWHRDHHEPHDNTLEKNDLFAVVFGTINAAMYIYGA  
LYSDALWWFALGITLYGVIYTLVHDGLVHQRYFRWVPKKGYAKRLVQAHKLHHTIGKEGGVSFGFVFAR  
DPVKLKAELKEQRKAGIAKVREADLS

### **Altish\_0007, 240 aa, WP\_067596721**

MVFGMLFAAVSMTLIVALRYLISSGMFAWITVRLRPGQHDGLKQPQIRREIKWSLASAAIYGVPAGLAFWS  
WRHLGWTHMYLDPLDYPVWYMPLSALIYLFADHTWFWYTHRAMHWPVLFRLAHSVHNSRPPTAWAAMSF  
HPIEALSGAIVIPALVLLVPIHMGILGLVLAVMTIMGVTNHMGWEMFPRWLVHSRFGKVVITASHHERHH  
EEYQCNYGLYFRFWDKVCGTDRGLTTRFAQ

### **Altish\_0008, 129 aa, WP\_067602229**

*MNEPPTGTVTVTIT*EMRSSEGVVRACMTTNREIFPRCRKDPASHRTVVTASENMTLTFTGVKPGNYAIAL  
LHDENDNGKADRVLGMPKEGFGFSRDAKVQMAPPKFDDAVFEFDGSAEELTIRMRYML

### **Altish\_0009, 255 aa, WP\_067596418**

MPYRASTVSHPMKLPSPNSQRLGLVLAALIAGSWLGIHFYAMFVFELESWQAWPQVLLMATLQCWLSVGV  
FIVCHDAMHGSLAPGWQRVNSALGAILLFLYAGFAWRKIRDAHFAHKKHTGKDGDPDFDTANPTHFWAWY  
WTFKRYFGWQSLLYVHMVVGIIYLFVFGIPIFMQIFLLYGAPALLSSLQLFYFGTYRPHRHLGESFADGHN  
ARSDNFSTLASLASCFFHGYHLEHHRPDPVPPWALPGARRAGVAA
